# Supplementary material for: Off-Target Deletion of Conditional Dbc1 Allele in the Foxp3YFP-Cre Mouse Line under Specific Setting
Source: MDPI journal article supplement (doi:10.3390/cells8111309), 2019-10-24
Supplement: s1 [file s1]

## Supplementary Figures

**Figure S1.**

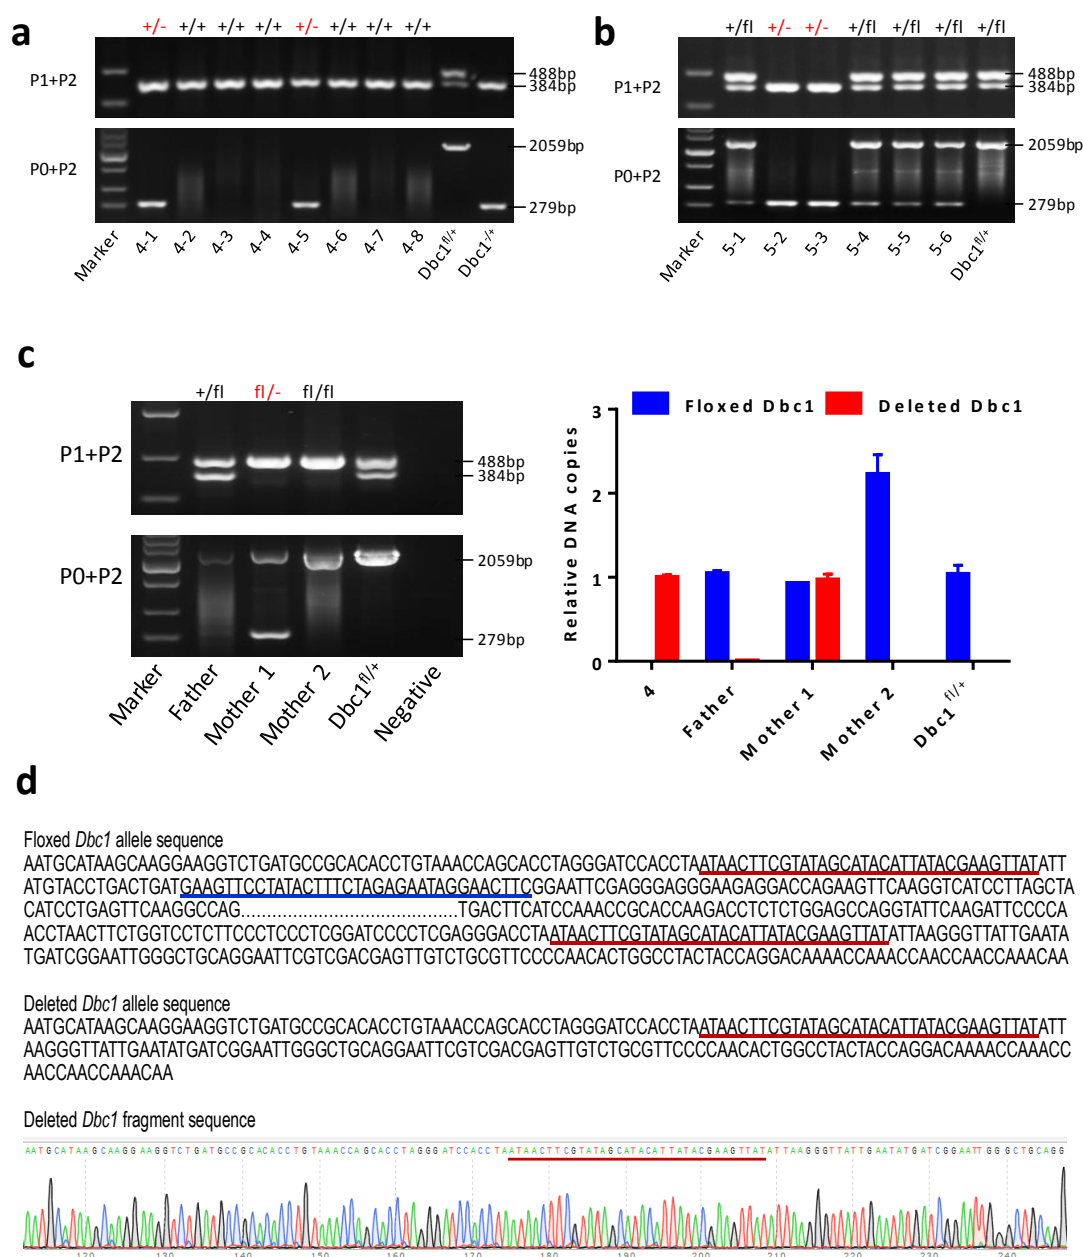

**Figure S1.** The conditional *Dbc1* allele was completely deleted in some offspring of *Foxp3<sup>Cre/Y</sup>* *Dbc1<sup>fl/+</sup>* crossing *Foxp3<sup>Cre/Cre</sup>* *Dbc1<sup>fl/fl</sup>* mice. (a) The PCR product sizes of the offspring of mouse #4 in Figure 2a crossing Wt mice using the primer indicated. (b) The PCR product sizes of the offspring of mouse #5 in Figure 2a crossing Wt mice using the primer indicated. (c) Left panel: the PCR product sizes of the father and mother of mouse #4 and #5 in Figure 2a; right panel: the relative amounts of the floxed *Dbc1* and recombined *Dbc1* of father and mother of mouse #4 and #5 in Figure 2a were tested by qPCR. For qPCR, the results were normalized to the DNA sample from *Dbc1<sup>fl/+</sup>* mice or mouse #4 in Figure 2a. The data were represented as the mean  $\pm$

standard deviation of three independent experiments. +/-, +/+, +/-, fl/- and fl/fl show the genotype of *Dbc1* alleles. (d) The sequence of the deleted *Dbc1* allele. The red underlined sequence is LoxP site; the blue underlined sequence is FRT site.

**Figure S2.**

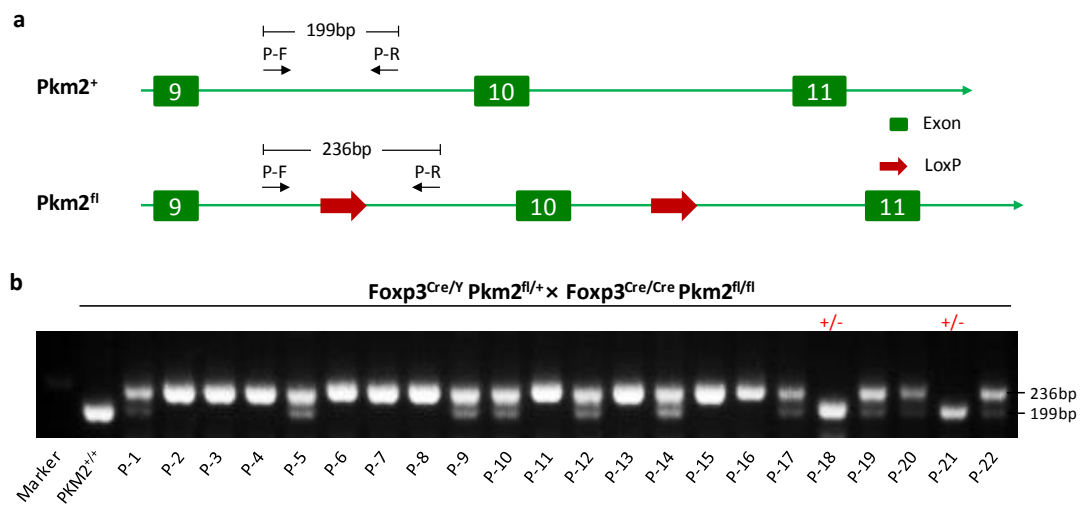

**Figure S2.** The conditional *Pkm2* allele was completely deleted in some offspring of male *Foxp3*<sup>Cre/Y</sup> *Pkm2*<sup>fl/+</sup> mice crossing female *Foxp3*<sup>Cre/Cre</sup> *Pkm2*<sup>fl/fl</sup> mice. (a) Scheme of conditional *Pkm2* allele. And the sites of the primer P-F and primer P-R. (b) The PCR product sizes of the offspring of *Foxp3*<sup>Cre/Y</sup> *Pkm2*<sup>fl/+</sup> mice crossing female *Foxp3*<sup>Cre/Cre</sup> *Pkm2*<sup>fl/fl</sup> mice using the primer indicated. +/- shows the genotype of *Pkm2* alleles.

**Figure S3.**

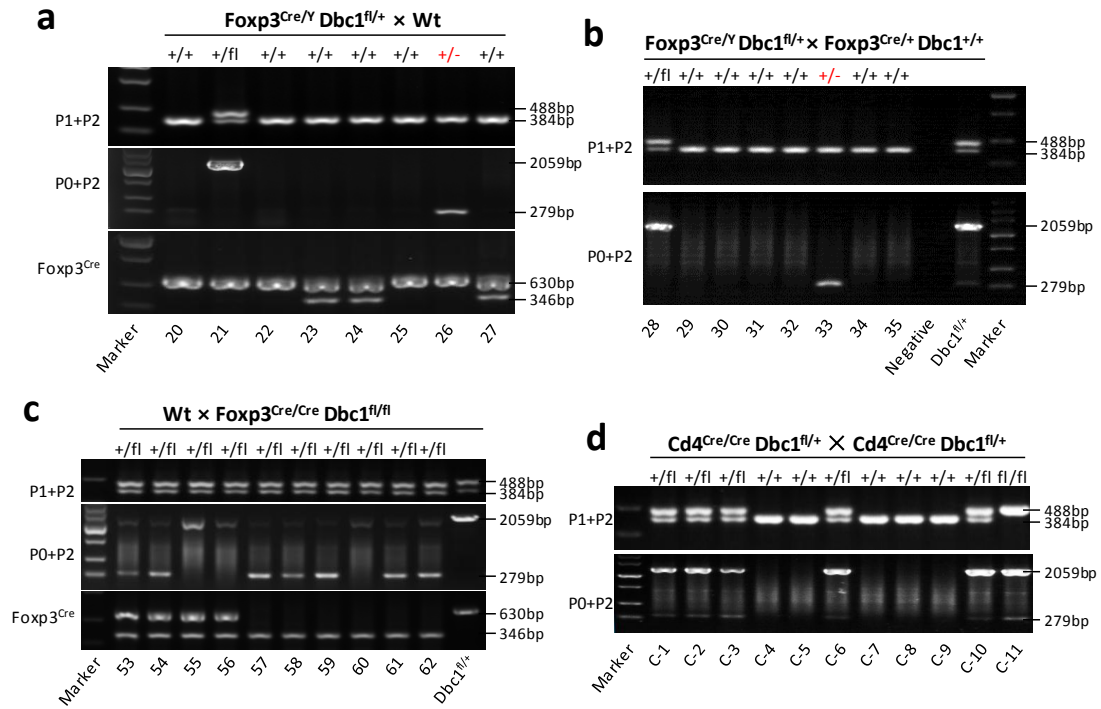

**Figure S3. Genotype the mice in the progeny of different breeding pairs.** (a) The PCR product sizes of the offspring of *Foxp3<sup>Cre/Y</sup> Dbc1<sup>fl/+</sup> × Wt* mice using the primer indicated. (b) The PCR product sizes of the offspring of *Foxp3<sup>Cre/Y</sup> Dbc1<sup>fl/+</sup> × Foxp3<sup>Cre/+</sup> Dbc1<sup>+/+</sup>* mice using the primer indicated. (c) The PCR product sizes of the offspring of *Wt × Foxp3<sup>Cre/Cre</sup> Dbc1<sup>fl/fl</sup>* mice using the primer indicated. (d) The PCR product sizes of the offspring of female *CD4<sup>Cre/Cre</sup> Dbc1<sup>fl/+</sup>* mice crossing with male *CD4<sup>Cre/Cre</sup> Dbc1<sup>fl/+</sup>* mice using the primer indicated. +/-, +/+, +/fl, and fl/fl show the genotype of *Dbc1* alleles. The panel of *Foxp3<sup>Cre</sup>* shows the genotype of *Foxp3*-IRES-YFP-Cre alleles.

**Figure S4.**

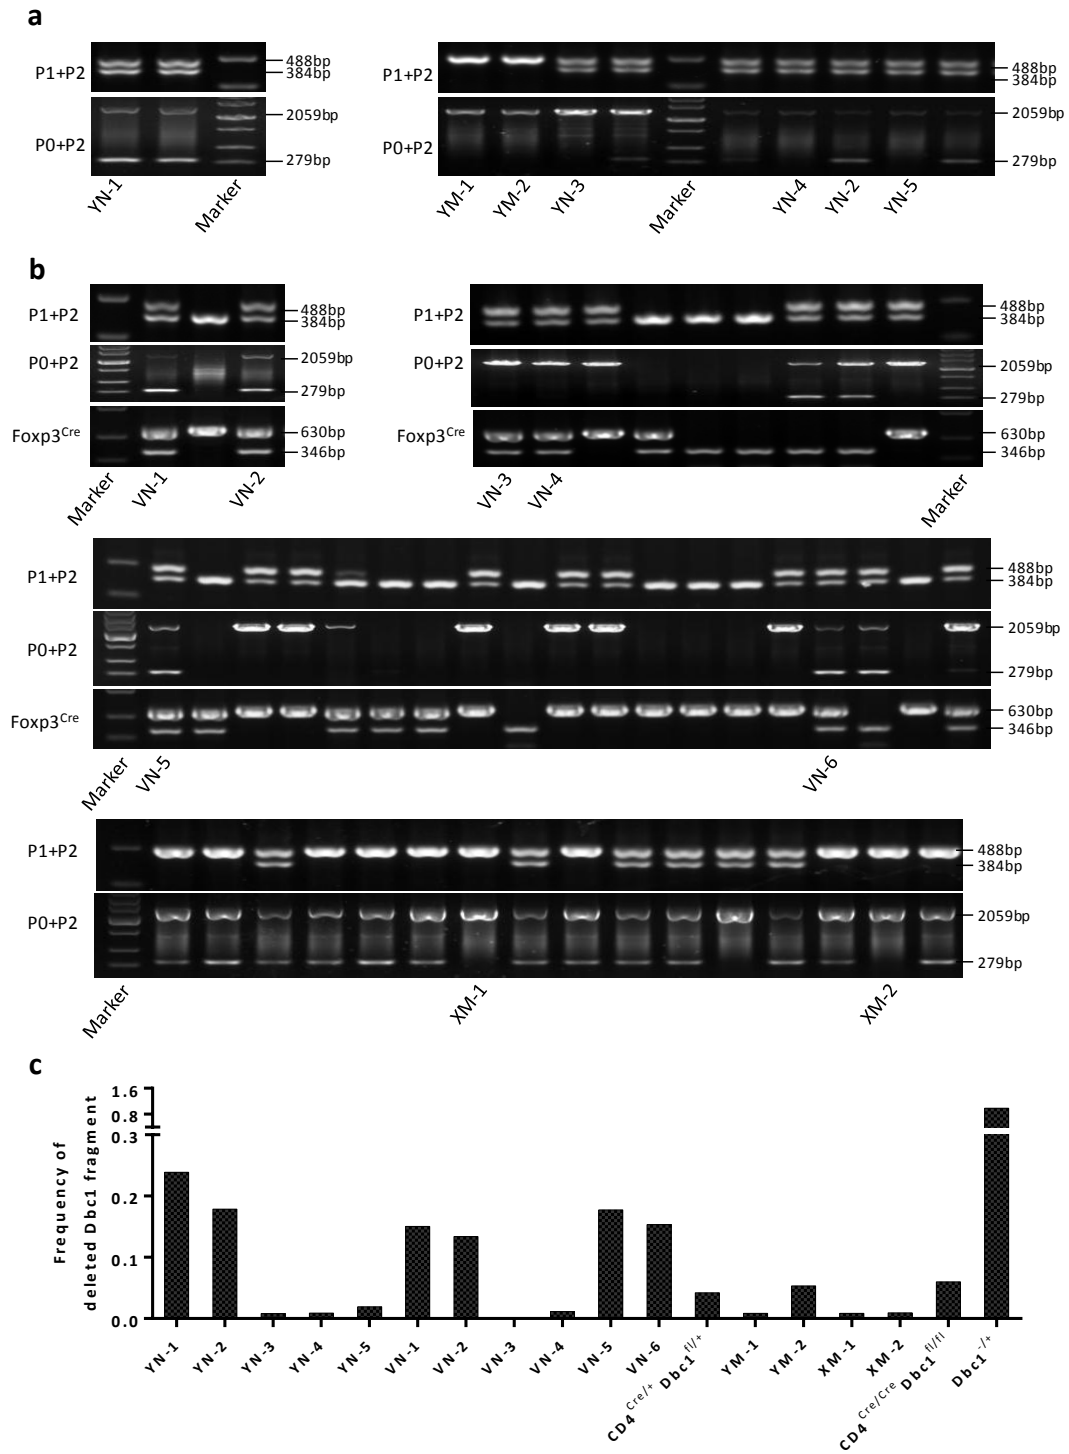

**Figure S4. The genotype of mice chosen to breed.** (a) The genotype of male mice chosen to breed in table 1. (b) The genotype of female mice chosen to breed in table 1. (c) The frequency of recombined *Dbc1* fragment in the mice chosen to breed in table 1.

**Figure S5.**

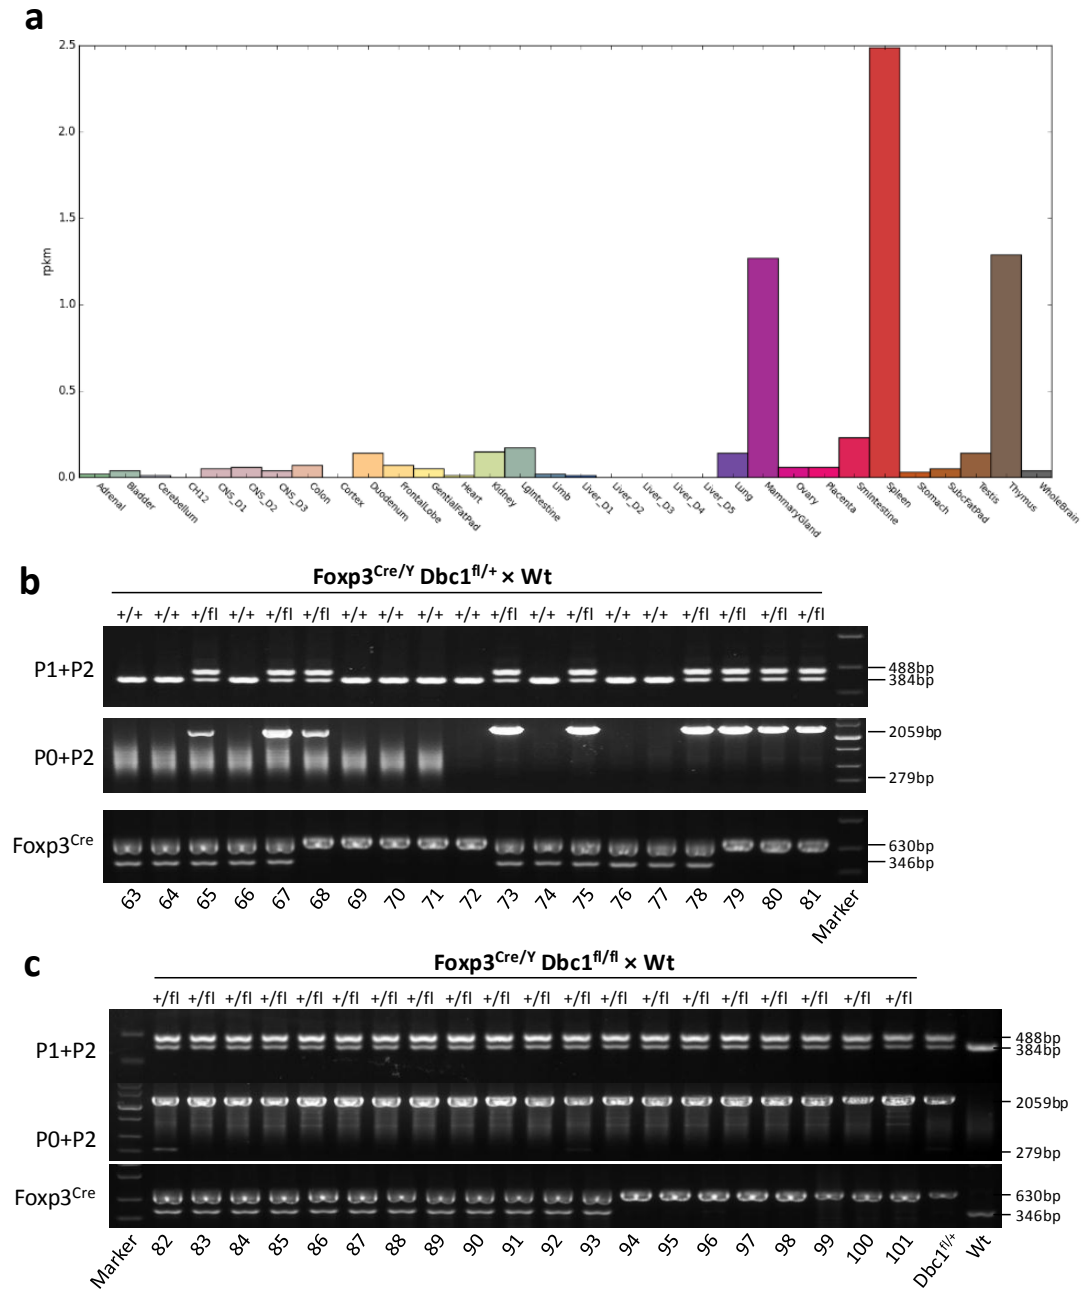

**Figure S5. The expression of *Foxp3* in the testis did not cause knockout of *Dbc1* allele in the offspring of *Foxp3<sup>Cre/Y</sup> Dbc1<sup>fl/+</sup>* mice**

(a) *Foxp3* expression across multiple tissues/cell lines (Data come from ENCODE). (b) The PCR product sizes of the offspring of Wt female mice crossing male *Foxp3<sup>Cre/Y</sup> Dbc1<sup>fl/+</sup>* mice with a low frequency of recombined *Dbc1* fragment using the primer indicated. (c) The PCR product sizes of the offspring of Wt female mice crossing male *Foxp3<sup>Cre/Y</sup> Dbc1<sup>fl/fl</sup>* mice with a low frequency of recombined *Dbc1* fragment using the primer indicated. +/+, and +/fl show the genotype of *Dbc1* alleles. The panel of *Foxp3<sup>Cre</sup>* shows the genotype of *Foxp3*-IRES-YFP-Cre alleles.

**Figure S6.**

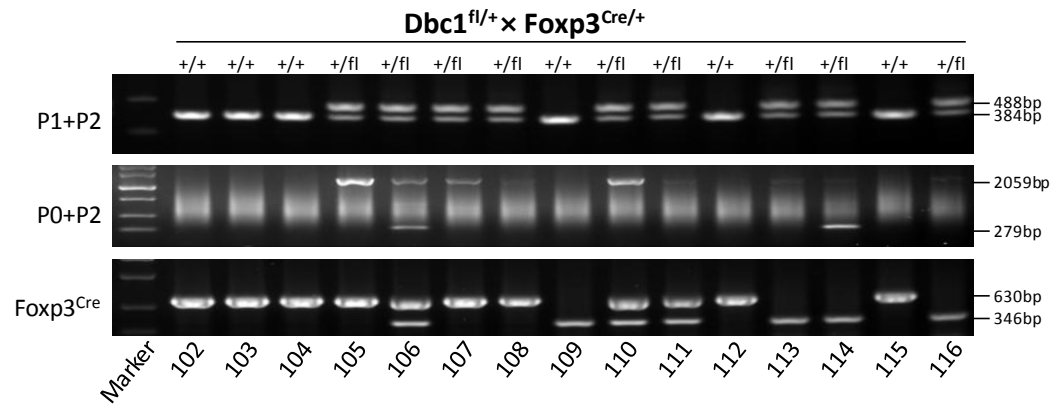

**Figure S6. The *Dbc1* alleles of some fetuses in the progeny of *Foxp3*<sup>Cre</sup> *Dbc1*<sup>fl</sup> mice were recombined.** The PCR product sizes of the offspring of male *Dbc1*<sup>fl/+</sup> mice crossing female *Foxp3*<sup>Cre/+</sup> mice using the primer indicated. +/+, and +/- show the genotype of *Dbc1* alleles. The panel of *Foxp3*<sup>Cre</sup> shows the genotype of *Foxp3*-IRES-YFP-Cre alleles.
